# Supplementary material for: Treatment of humerus fractures in the elderly: A systematic review covering effectiveness, safety, economic aspects and evolution of practice
Source: PubMed Central journal article supplement (PMC6292626; doi:10.1371/journal.pone.0207815), 2018-12-13
Supplement: pone.0207815.s001.pdf [file pone.0207815.s001.pdf]

# S1 Appendix.

Search strategy for the purpose of a HTA analysis performed by the Swedish Agency for Health Technology Assessment and Assessment of Social Services

## Effectiveness and complications of treatments

PubMed via NLM 01 December 2016

Title: Treatment options for fractures of the upper extremity in the elderly

| Search terms                                                                                                                                                                                                                                                                                                                                                                                                                                                                                                                                                                                                                                                                                                                                                                                                                                                                                                                                                                                                                                | Items found |
|---------------------------------------------------------------------------------------------------------------------------------------------------------------------------------------------------------------------------------------------------------------------------------------------------------------------------------------------------------------------------------------------------------------------------------------------------------------------------------------------------------------------------------------------------------------------------------------------------------------------------------------------------------------------------------------------------------------------------------------------------------------------------------------------------------------------------------------------------------------------------------------------------------------------------------------------------------------------------------------------------------------------------------------------|-------------|
| <b>Population: Arm fractures</b>                                                                                                                                                                                                                                                                                                                                                                                                                                                                                                                                                                                                                                                                                                                                                                                                                                                                                                                                                                                                            |             |
| 1. "Osteoporotic Fractures"[Mesh] OR "Osteoporosis/surgery"[Mesh] OR "Radius Fractures"[Majr] OR "Colles' Fracture"[Majr] OR "Ulna Fractures"[Majr] OR "Humeral Fractures"[Majr] OR "Shoulder Fractures"[Majr] OR "Wrist Injuries"[Majr] OR humeral[Title] OR distal radial[Title] OR osteoporo*[Title] OR ulna[Title]                                                                                                                                                                                                                                                                                                                                                                                                                                                                                                                                                                                                                                                                                                                      | 49337       |
| 2. (((osteoporo*[Title/Abstract] OR distal radial[Title/Abstract] OR distal radius[Title/Abstract] OR humerus[Title/Abstract] OR humeral[Title/Abstract] OR humerus[Title/Abstract] OR supracondylar[Title/Abstract] OR ulna[Title/Abstract] OR wrist*[Title/Abstract] OR collum chirurg*[Title/Abstract] OR elbow*[Title/Abstract] OR olecranon[Title/Abstract] OR shoulder*[Title/Abstract] OR arm[Title/Abstract] OR upper extrem*[Title/Abstract] OR upper limb*[Title/Abstract] OR forearm*[Title/Abstract] OR fore arm*[Title/Abstract] OR barton*[Title/Abstract] OR colle*[Title/Abstract]) AND fracture*[Title/Abstract]) NOT medline[SB])                                                                                                                                                                                                                                                                                                                                                                                         | 7607        |
| 3. 1 OR 2                                                                                                                                                                                                                                                                                                                                                                                                                                                                                                                                                                                                                                                                                                                                                                                                                                                                                                                                                                                                                                   | 55029       |
| <b>Interventions</b>                                                                                                                                                                                                                                                                                                                                                                                                                                                                                                                                                                                                                                                                                                                                                                                                                                                                                                                                                                                                                        |             |
| 4. "surgery" [Subheading] OR "Orthopedic Fixation Devices"[Majr] OR "Bone Nails"[Majr] OR "Bone Plates"[Majr] OR "Bone Screws"[Majr] OR "Bone Wires"[Majr] OR "Casts, Surgical"[Majr] OR "External Fixators"[Majr] OR "Internal Fixators"[Majr] OR "Splints"[Majr] OR "Suture Anchors"[Majr] OR "Orthotic Devices"[Mesh] OR "Athletic Tape"[Mesh] OR "Braces"[Mesh] OR "Fracture Fixation, Internal"[Majr] OR "Fracture Fixation, Intramedullary"[Majr] OR "Fracture Fixation/methods"[Majr] OR "Fracture Fixation/methods"[Mesh] OR "Arthroplasty/methods"[Mesh] OR plate*[Title] OR nail*[Title] OR fixation[Title]                                                                                                                                                                                                                                                                                                                                                                                                                       | 1928926     |
| 5. (nail*[Title/Abstract] OR plate[Title/Abstract] OR plating[Title/Abstract] OR plates[Title/Abstract] OR pin[Title/Abstract] OR pins[Title/Abstract] OR pinning*[Title/Abstract] OR implant*[Title/Abstract] OR screw*[Title/Abstract] OR wire*[Title/Abstract] OR k-wire*[Title/Abstract] OR kirschner*[Title/Abstract] OR splint*[Title/Abstract] OR tension band*[Title/Abstract] OR orthotic[Title/Abstract] OR orthosis[Title/Abstract] OR tape[Title/Abstract] OR plaster[Title/Abstract] OR brace*[Title/Abstract] OR collar[Title/Abstract] OR slab[Title/Abstract] OR bridging[Title/Abstract] OR non-bridging[Title/Abstract] OR non-bridging[Title/Abstract] OR external fixat*[Title/Abstract] OR internal fixat*[Title/Abstract] OR prosthes*[Title/Abstract] OR cast[Title/Abstract] OR casts[Title/Abstract] OR plaster*[Title/Abstract] OR arthroplast*[Title/Abstract] OR non-surgical treatment*[Title/Abstract] OR nonsurgical treatment*[Title/Abstract] OR conservative treatment*[Title/Abstract]) NOT medline[SB]) | 106115      |

|                                                                                                                                  |                                                                                                                                                                                                                                                                                                                                                                                                                                                                                                                                                                                                                                                                                                   |             |
|----------------------------------------------------------------------------------------------------------------------------------|---------------------------------------------------------------------------------------------------------------------------------------------------------------------------------------------------------------------------------------------------------------------------------------------------------------------------------------------------------------------------------------------------------------------------------------------------------------------------------------------------------------------------------------------------------------------------------------------------------------------------------------------------------------------------------------------------|-------------|
| 6.                                                                                                                               | 4 OR 5                                                                                                                                                                                                                                                                                                                                                                                                                                                                                                                                                                                                                                                                                            | 2027904     |
| <b>Combined sets</b>                                                                                                             |                                                                                                                                                                                                                                                                                                                                                                                                                                                                                                                                                                                                                                                                                                   |             |
| 7.                                                                                                                               | 3 AND 6                                                                                                                                                                                                                                                                                                                                                                                                                                                                                                                                                                                                                                                                                           | 18105       |
| <b>Study types: randomised controlled trials and other trials (filter: PubMed clinical queries, therapy, broad) <sup>1</sup></b> |                                                                                                                                                                                                                                                                                                                                                                                                                                                                                                                                                                                                                                                                                                   |             |
| <b>Added terms for: case-control, registry, cohort</b>                                                                           |                                                                                                                                                                                                                                                                                                                                                                                                                                                                                                                                                                                                                                                                                                   |             |
| 8.                                                                                                                               | ((clinical[Title/Abstract] AND trial[Title/Abstract]) OR clinical trials[MeSH Terms] OR clinical trial[Publication Type] OR random*[Title/Abstract] OR random allocation[MeSH Terms] OR therapeutic use[MeSH Subheading]) OR "Comparative Study" [Publication Type] OR "Evaluation Studies" [Publication Type] OR "Cohort Studies"[Mesh] OR "Longitudinal Studies"[Mesh] OR "Prospective Studies"[Mesh] OR "Retrospective Studies"[Mesh] OR "Case-Control Studies"[Mesh] OR cohort*[Title/Abstract] OR longitudinal[Title/Abstract] OR prospective[Title/Abstract] OR retrospective[Title/Abstract] OR observational[Title/Abstract] OR registr*[Title/Abstract] OR case-control*[Title/Abstract] | 7374170     |
| <b>Limits:</b>                                                                                                                   |                                                                                                                                                                                                                                                                                                                                                                                                                                                                                                                                                                                                                                                                                                   |             |
| 9.                                                                                                                               | (animals [MeSH] NOT humans [MeSH])                                                                                                                                                                                                                                                                                                                                                                                                                                                                                                                                                                                                                                                                | 4230327     |
| 10.                                                                                                                              | Filters: <b>Publication date from 1990/01/01 to 2016/12/31; English; Danish; Norwegian; Swedish</b>                                                                                                                                                                                                                                                                                                                                                                                                                                                                                                                                                                                               |             |
| 11.                                                                                                                              | <b>(7 AND 8 AND 10) NOT 9</b>                                                                                                                                                                                                                                                                                                                                                                                                                                                                                                                                                                                                                                                                     | <b>6307</b> |

The search result, usually found at the end of the documentation, forms the list of abstracts.

[MeSH] = Term from the Medline controlled vocabulary, including terms found below this term in the MeSH hierarchy

[MeSH:NoExp] = Does not include terms found below this term in the MeSH hierarchy

[MAJR] = MeSH Major Topic

[Title/Abstract] = Title or abstract

[Title] = Title

[AU] = Author

[TW] = Text Word

Systematic[SB] = Filter for retrieving systematic reviews

\* = Truncation

<sup>1</sup> Haynes RB, McKibbin KA, Wilczynski NL, Walter SD, Werre SR, Hedges Team. Optimal search strategies for retrieving scientifically strong studies of treatment from Medline: analytical survey. *BMJ* 20 = 614181305;330(7501):1179.

| Search terms                                                                                                                                                                                                                                                                                                                                                                                                                                                                             | Items found |
|------------------------------------------------------------------------------------------------------------------------------------------------------------------------------------------------------------------------------------------------------------------------------------------------------------------------------------------------------------------------------------------------------------------------------------------------------------------------------------------|-------------|
| <b>Population: Arm fractures</b>                                                                                                                                                                                                                                                                                                                                                                                                                                                         |             |
| 1. [mh "osteoporotic fractures"] or [mh osteoporosis/PX,SU] or [mh "radius fractures"] or [mh "colles' fracture"] OR [mh "ulna fractures"] OR [mh "humeral fractures"] OR [mh "shoulder fractures"] OR [mh "wrist injuries"]                                                                                                                                                                                                                                                             | 941         |
| 2. ((osteoporo* or "distal radial" or "distal radius" or humerus or humeral or humerous or supracondylar or ulna or wrist* or "collum chirurgicum" or elbow* or olecranon or shoulder* or arm or "upper extremities" or "upper extremity" or "upper limb" or "upper limbs" or forearm* or "fore arm" or barton* or colle*) near/4 fracture*):ti,ab,kw                                                                                                                                    | 3051        |
| 3. 1 OR 2                                                                                                                                                                                                                                                                                                                                                                                                                                                                                | 3168        |
| <b>Population: Age</b>                                                                                                                                                                                                                                                                                                                                                                                                                                                                   |             |
| 4. [mh^adult] or [mh aged] or [mh "middle aged"] or [mh "aged, 80 and over"] OR [mh "frail elderly"] or [mh menopause] or [mh "age factors"] or (adult* or old or older):ti or (aging or elderly or elder or aged or "old patients" or "old age" or "old people" or "middle age" or "middle ages" or menopaus* or "post menopause" or "post menopausal" or postmenopaus*):ti,ab,kw                                                                                                       | 396963      |
| 5. 3 AND 4                                                                                                                                                                                                                                                                                                                                                                                                                                                                               | 1993        |
| <b>Interventions</b>                                                                                                                                                                                                                                                                                                                                                                                                                                                                     |             |
| 6. [mh "orthopedic fixation devices"] or [mh "bone nails"] or [mh "bone plates"] or [mh "bone screws"] or [mh "bone wires"] or [mh "casts, surgical"] or [mh "external fixators"] or [mh "internal fixators"] or [mh splints] or [mh "suture anchors"] or [mh "orthotic devices"] or [mh "athletic tape"] or [mh braces] or [mh "fracture fixation, internal"] or [mh "fracture fixation, intramedullary"] or [mh "fracture fixation"] or [mh arthroplasty]                              | 8318        |
| 7. (nail* or plate or plating or plates or pin or pins or pinning or implant* or screw* or wire* or "k-wire" or kirschner* or splint* or "tension band" or orthotic or orthosis or tape or plaster or brace* or collar or slab or bridging or "non-bridging" or nonbridging or "external fixation" or "internal fixation" or prosthes* or cast or casts or plaster* or arthroplast* or (non next surgical) or (nonsurgical next treatment*) or (conservative next treatment*)): ti,ab,kw | 47232       |
| 8. 6 OR 7                                                                                                                                                                                                                                                                                                                                                                                                                                                                                | 47852       |
| <b>Combined sets</b>                                                                                                                                                                                                                                                                                                                                                                                                                                                                     |             |
| 9. 5 AND 8                                                                                                                                                                                                                                                                                                                                                                                                                                                                               | 1106        |
| <b>Limits</b>                                                                                                                                                                                                                                                                                                                                                                                                                                                                            |             |
| 10. Publication Year from 1990 to 2016                                                                                                                                                                                                                                                                                                                                                                                                                                                   |             |
| <b>9 AND 10</b>                                                                                                                                                                                                                                                                                                                                                                                                                                                                          | <b>581</b>  |
|                                                                                                                                                                                                                                                                                                                                                                                                                                                                                          | CDSR/69     |
|                                                                                                                                                                                                                                                                                                                                                                                                                                                                                          | DARE/21     |
|                                                                                                                                                                                                                                                                                                                                                                                                                                                                                          | Central/476 |
|                                                                                                                                                                                                                                                                                                                                                                                                                                                                                          | CRM/        |
|                                                                                                                                                                                                                                                                                                                                                                                                                                                                                          | HTA/3       |
|                                                                                                                                                                                                                                                                                                                                                                                                                                                                                          | EED/12      |

The search result, usually found at the end of the documentation, forms the list of abstracts.

“ ” = Citation Marks; searches for an exact phrase

CDSR = Cochrane Database of Systematic Review

CENTRAL = Cochrane Central Register of Controlled Trials, “trials”

CRM = Method Studies

DARE = Database Abstracts of Reviews of Effects, “other reviews”

EED = Economic Evaluations

HTA = Health Technology Assessments

Embase via Elsevier 01 December 2016

Title: Treatment options for fractures of the upper extremity in the elderly

| Search terms                                                                                                                                                                                                                                                                                                                                                                                                                                                                                                                                              | Items found |
|-----------------------------------------------------------------------------------------------------------------------------------------------------------------------------------------------------------------------------------------------------------------------------------------------------------------------------------------------------------------------------------------------------------------------------------------------------------------------------------------------------------------------------------------------------------|-------------|
| <b>Population: Arm fractures</b>                                                                                                                                                                                                                                                                                                                                                                                                                                                                                                                          |             |
| 1. 'osteoporosis'/exp/dm_su OR 'fragility fracture'/exp/mj OR 'arm fracture'/exp/mj                                                                                                                                                                                                                                                                                                                                                                                                                                                                       | 25382       |
| 2. ((osteoporo* OR fragility OR 'distal radial' OR 'distal radius' OR humerus OR humeral OR humerous OR supracondylar OR radius OR ulna OR wrist* OR "collum chirurgicum" OR hand OR elbow* OR olecranon OR arm OR shoulder* OR 'upper extremities' OR 'upper extremity' OR 'upper limb' OR 'upper limbs' OR forearm* OR 'fore arm' OR barton* OR colle*) NEAR/4 fracture*):ab,ti                                                                                                                                                                         | 43421       |
| 3. 1 OR 2                                                                                                                                                                                                                                                                                                                                                                                                                                                                                                                                                 | 51498       |
| <b>Population: Age</b>                                                                                                                                                                                                                                                                                                                                                                                                                                                                                                                                    |             |
| 4. 'adult'/de OR 'adulthood'/exp OR 'middle aged'/exp OR 'menopause and climacterium'/exp OR 'aged'/de OR 'aged hospital patient'/exp OR 'frail elderly'/exp OR 'very elderly'/exp OR (adult* OR old OR older):ti OR (aging OR 'middle age' OR 'middle ages' OR middleage* OR menopaus* OR postmenopaus* OR elderly OR elder OR aged OR 'old patients' OR 'old age' OR 'old people' OR 'older people'):ti,ab OR (post NEXT/2 menopaus* OR men OR women):ti,ab                                                                                             | 7387386     |
| 5. 3 AND 4                                                                                                                                                                                                                                                                                                                                                                                                                                                                                                                                                | 30130       |
| <b>Interventions</b>                                                                                                                                                                                                                                                                                                                                                                                                                                                                                                                                      |             |
| 6. 'orthopedic prostheses, orthoses and implants'/exp/mj OR 'fracture treatment'/exp/mj OR 'plaster cast'/exp OR 'arthroplasty'/de OR 'elbow arthroplasty'/exp OR 'finger arthroplasty'/exp OR 'shoulder arthroplasty'/exp OR 'joint mobilization'/exp/mj                                                                                                                                                                                                                                                                                                 | 137996      |
| 7. (((nail* OR plate OR plating OR plates OR pin OR pins OR pinning OR implant* OR screw* OR wire* OR "k-wire" OR kirschner* OR splint* OR "tension band" OR orthotic OR orthosis OR tape OR plaster OR brace* OR collar OR slab OR bridging OR "non-bridging" OR nonbridging) NEAR/8 (fracture* OR fixation* OR locking OR looked)) OR "internal fixation" OR "external fixation" OR prothes* OR cast OR casts OR plaster* OR arthroplast* OR (surgical NEXT/2 treatment*) OR (nonsurgical NEXT/2 treatment*) OR (conservative NEXT/2 treatment*)):ab,ti | 412008      |
| 8. 6 OR 7                                                                                                                                                                                                                                                                                                                                                                                                                                                                                                                                                 | 475682      |
| <b>Combined sets</b>                                                                                                                                                                                                                                                                                                                                                                                                                                                                                                                                      |             |
| 9. 5 AND 8                                                                                                                                                                                                                                                                                                                                                                                                                                                                                                                                                | 18294       |
| <b>Study types</b>                                                                                                                                                                                                                                                                                                                                                                                                                                                                                                                                        |             |
| 10. 'randomized controlled trial'/exp OR 'observational study'/exp OR 'clinical study'/exp OR 'meta analysis'/exp OR 'meta analysis (topic)'/exp OR 'evaluation study'/exp OR 'pretest posttest control group design'/exp OR random*:ti OR (randomiz* OR randomis*):ab OR (trial* OR cohort* OR observation* OR longitudinal* OR prospective* OR retrospective* OR 'case control' OR prepost* OR 'pre post' OR 'pre test' OR pretest* OR 'post test' OR post-test* OR metaanaly* OR (meta NEXT/1 analy*)):ab,ti OR (program* NEXT/1 evalut*):ab,ti        | 9540104     |
| <b>Limits</b>                                                                                                                                                                                                                                                                                                                                                                                                                                                                                                                                             |             |
| 11. ([article]/lim OR [article in press]/lim OR [review]/lim) AND (([danish]/lim OR [english]/lim OR [norwegian]/lim OR [swedish]/lim) AND [1990-2016]/py                                                                                                                                                                                                                                                                                                                                                                                                 |             |
| 12. (('animal'/exp OR 'nonhuman'/exp) NOT 'human'/exp)                                                                                                                                                                                                                                                                                                                                                                                                                                                                                                    |             |
| <b>(9 AND 10 AND 11) NOT 12</b>                                                                                                                                                                                                                                                                                                                                                                                                                                                                                                                           | <b>5102</b> |

/de= Term from the EMTREE controlled vocabulary

/exp= Includes terms found below this term in the EMTREE hierarchy

/mj = Major Topic

:ab = Abstract

:au = Author

:ti = Article Title

:ti:ab = Title or abstract

\* = Truncation

“ “ = Citation Marks; searches for an exact phrase “ “ = Citation Marks; searches for an exact phrase

## Scopus via Elsevier 02 December 2016

### Title: Treatment options for fractures of the upper extremity in the elderly

| Search terms                                                                                                                                                                                                                                                                                                                                                                                                                                                                                      | Items found |
|---------------------------------------------------------------------------------------------------------------------------------------------------------------------------------------------------------------------------------------------------------------------------------------------------------------------------------------------------------------------------------------------------------------------------------------------------------------------------------------------------|-------------|
| <b>Population: Arm fractures</b>                                                                                                                                                                                                                                                                                                                                                                                                                                                                  |             |
| 1. TITLE (osteopor* W/15 fracture*) OR (radius W/15 fracture*) OR (radial W/15 fracture*) OR (distal W/15 fracture*) OR "colles fracture" OR "colles fractures" OR (ulna W/15 fracture*) OR (humeral W/15 fracture*) OR (humerous W/15 fracture*) OR (humerus W/15 fracture*) OR supracondylar OR (shoulder W/15 fracture*) OR (wrist W/15 fracture*) OR (collum W/3 chirurg*) OR (elbow W/15 fracture*) OR olecranon OR barton                                                                   | 25306       |
| <b>Population: Age</b>                                                                                                                                                                                                                                                                                                                                                                                                                                                                            |             |
| 2. TITLE-ABS-KEY (adult* or old or older or aging or elderly or elder or aged or "old patients" or "old age" or "old people" or "middle age" or "middle ages" or menopaus* or "post menopause" or "post menopausal" or postmenopaus*)                                                                                                                                                                                                                                                             | 9261568     |
| <b>Interventions</b>                                                                                                                                                                                                                                                                                                                                                                                                                                                                              |             |
| 3. TITLE-ABS-KEY (nail* OR plate OR plating OR plates OR pin OR pins OR pinning* OR implant* OR screw* OR wire* OR k-wire OR k-wires OR kirschner* OR splint* OR (tension W/15 band*) OR orthotic OR orthosis OR tape OR plaster OR brace* OR collar OR slab OR bridging OR non-bridging OR nonbridging OR external fixat* OR internal fixat* OR prosthes* OR cast OR casts OR plaster* OR arthroplast* OR "non-surgical treatment" OR "nonsurgical treatment" OR (conservative W/15 treatment*)) | 2310964     |
| <b>Combined sets</b>                                                                                                                                                                                                                                                                                                                                                                                                                                                                              |             |
| 4. 1 AND 2 AND 3                                                                                                                                                                                                                                                                                                                                                                                                                                                                                  | 6286        |
| <b>Study types</b>                                                                                                                                                                                                                                                                                                                                                                                                                                                                                |             |
| 5. TITLE-ABS-KEY random* OR cohort* OR longitudinal OR prospective OR retrospective OR observational OR registr* OR "case-control" OR "clinical trial" OR "clinical trials"                                                                                                                                                                                                                                                                                                                       | 4827592     |
| <b>Limits</b>                                                                                                                                                                                                                                                                                                                                                                                                                                                                                     |             |
| 6. (LIMIT-TO (DOCTYPE, "ar") OR LIMIT-TO (DOCTYPE,"re")) AND (LIMIT- TO(LANGUAGE, "English", AND (LIMIT-TO( SRCTYPE,"j" )                                                                                                                                                                                                                                                                                                                                                                         |             |
| <b>4 AND 5 AND 6</b>                                                                                                                                                                                                                                                                                                                                                                                                                                                                              | <b>1982</b> |

**TITLE-ABS-KEY** = Title or abstract or keywords

**ALL** = All fields

**PRE/n** = "precedes by". The first term in the search must precede the second by a specified number of terms (n).

**W/n** = "within". The terms in the search must be within a specified number of terms (n) in any order.

\* = Truncation

“ “ = Citation Marks; searches for an exact phrase

LIMIT-TO ( SRCTYPE , "j" = Limit to source type journal

LIMIT-TO ( DOCTYPE , "ar" = Limit to document type article

LIMIT-TO ( DOCTYPE , "re" = Limit to document type review

## Health economic aspects

PubMed via NLM 01 December 2016

**Title: Treatment options for fractures of the upper extremity in the elderly: health economic aspects**

| Search terms                                                                                                                                                                                                                                                                                                                                                                                                                                                                                                                                                                                                                                                                                                                                                                                                                                                                                                                                                                                                                                 | Items found |
|----------------------------------------------------------------------------------------------------------------------------------------------------------------------------------------------------------------------------------------------------------------------------------------------------------------------------------------------------------------------------------------------------------------------------------------------------------------------------------------------------------------------------------------------------------------------------------------------------------------------------------------------------------------------------------------------------------------------------------------------------------------------------------------------------------------------------------------------------------------------------------------------------------------------------------------------------------------------------------------------------------------------------------------------|-------------|
| <b>Population: Arm fractures</b>                                                                                                                                                                                                                                                                                                                                                                                                                                                                                                                                                                                                                                                                                                                                                                                                                                                                                                                                                                                                             |             |
| 1. "Osteoporotic Fractures"[Mesh] OR "Osteoporosis/surgery"[Mesh] OR "Radius Fractures"[Majr] OR "Colles' Fracture"[Majr] OR "Ulna Fractures"[Majr] OR "Humeral Fractures"[Majr] OR "Shoulder Fractures"[Majr] OR "Wrist Injuries"[Majr] OR humeral[Title] OR distal radial[Title] OR osteoporo*[Title] OR ulna[Title]                                                                                                                                                                                                                                                                                                                                                                                                                                                                                                                                                                                                                                                                                                                       | 49337       |
| 2. (((osteoporo*[Title/Abstract] OR distal radial[Title/Abstract] OR distal radius[Title/Abstract] OR humerus[Title/Abstract] OR humeral[Title/Abstract] OR humerus[Title/Abstract] OR supracondylar[Title/Abstract] OR ulna[Title/Abstract] OR wrist*[Title/Abstract] OR collum chirurg*[Title/Abstract] OR elbow*[Title/Abstract] OR olecranon[Title/Abstract] OR shoulder*[Title/Abstract] OR arm[Title/Abstract] OR upper extremit*[Title/Abstract] OR upper limb*[Title/Abstract] OR forearm*[Title/Abstract] OR fore arm*[Title/Abstract] OR barton*[Title/Abstract] OR colle*[Title/Abstract]) AND fracture*[Title/Abstract]) NOT medline[SB])                                                                                                                                                                                                                                                                                                                                                                                        | 7607        |
| 3. 1 OR 2                                                                                                                                                                                                                                                                                                                                                                                                                                                                                                                                                                                                                                                                                                                                                                                                                                                                                                                                                                                                                                    | 55029       |
| <b>Interventions</b>                                                                                                                                                                                                                                                                                                                                                                                                                                                                                                                                                                                                                                                                                                                                                                                                                                                                                                                                                                                                                         |             |
| 4. "surgery" [Subheading] OR "Orthopedic Fixation Devices"[Majr] OR "Bone Nails"[Majr] OR "Bone Plates"[Majr] OR "Bone Screws"[Majr] OR "Bone Wires"[Majr] OR "Casts, Surgical"[Majr] OR "External Fixators"[Majr] OR "Internal Fixators"[Majr] OR "Splints"[Majr] OR "Suture Anchors"[Majr] OR "Orthotic Devices"[Mesh] OR "Athletic Tape"[Mesh] OR "Braces"[Mesh] OR "Fracture Fixation, Internal"[Majr] OR "Fracture Fixation, Intramedullary"[Majr] OR "Fracture Fixation/methods"[Majr] OR "Fracture Fixation/methods"[Mesh] OR "Arthroplasty/methods"[Mesh] OR plate*[Title] OR nail*[Title] OR fixation[Title]                                                                                                                                                                                                                                                                                                                                                                                                                        | 1928926     |
| 5. ((nail*[Title/Abstract] OR plate[Title/Abstract] OR plating[Title/Abstract] OR plates[Title/Abstract] OR pin[Title/Abstract] OR pins[Title/Abstract] OR pinning*[Title/Abstract] OR implant*[Title/Abstract] OR screw*[Title/Abstract] OR wire*[Title/Abstract] OR k-wire*[Title/Abstract] OR kirschner*[Title/Abstract] OR splint*[Title/Abstract] OR tension band*[Title/Abstract] OR orthotic[Title/Abstract] OR orthosis[Title/Abstract] OR tape[Title/Abstract] OR plaster[Title/Abstract] OR brace*[Title/Abstract] OR collar[Title/Abstract] OR slab[Title/Abstract] OR bridging[Title/Abstract] OR non-bridging[Title/Abstract] OR non-bridging[Title/Abstract] OR external fixat*[Title/Abstract] OR internal fixat*[Title/Abstract] OR prosthes*[Title/Abstract] OR cast[Title/Abstract] OR casts[Title/Abstract] OR plaster*[Title/Abstract] OR arthroplast*[Title/Abstract] OR non-surgical treatment*[Title/Abstract] OR nonsurgical treatment*[Title/Abstract] OR conservative treatment*[Title/Abstract]) NOT medline[SB]) | 106115      |
| 6. 4 OR 5                                                                                                                                                                                                                                                                                                                                                                                                                                                                                                                                                                                                                                                                                                                                                                                                                                                                                                                                                                                                                                    | 2027904     |
| <b>Combined sets</b>                                                                                                                                                                                                                                                                                                                                                                                                                                                                                                                                                                                                                                                                                                                                                                                                                                                                                                                                                                                                                         |             |
| 7. 3 AND 6                                                                                                                                                                                                                                                                                                                                                                                                                                                                                                                                                                                                                                                                                                                                                                                                                                                                                                                                                                                                                                   | 18105       |
| <b>Health economic aspects (filter: Edited version of NHS EED)</b>                                                                                                                                                                                                                                                                                                                                                                                                                                                                                                                                                                                                                                                                                                                                                                                                                                                                                                                                                                           |             |
| 8. (("Economics"[Mesh:NoExp] OR "Costs and Cost Analysis"[Mesh] OR "Economics, Dental"[Mesh] OR "Economics, Hospital"[Mesh] OR "Economics, Medical"[Mesh] OR "Economics, Nursing"[Mesh] OR "Economics, Pharmaceutical"[Mesh] OR economic*[Title/Abstract] OR cost[Title/Abstract] OR costs[Title/Abstract] OR costly[Title/Abstract] OR costing[Title/Abstract] OR price[Title/Abstract] OR prices[Title/Abstract] OR pricing[Title/Abstract] OR pharmaco-economic*[Title/Abstract] OR "value for money"[Title/Abstract] OR budget*[Title/Abstract] OR expenditure*[Title/Abstract] NOT energy[Title/Abstract])) NOT (energy                                                                                                                                                                                                                                                                                                                                                                                                                 | 727962      |

cost[Title/Abstract] OR oxygen cost[Title/Abstract] OR metabolic cost[Title/Abstract] OR energy expenditure[Title/Abstract] OR oxygen expenditure[Title/Abstract]))

| <b>Limits</b>        |                                                                                      |
|----------------------|--------------------------------------------------------------------------------------|
| 9.                   | Publication date from 1990/01/01 to 2016/12/31, Swedish, Norwegian, English, Danish. |
| <b>7 AND 8 AND 9</b> |                                                                                      |
|                      | <b>355</b>                                                                           |

7565

The search result, usually found at the end of the documentation, forms the list of abstracts.

[MeSH] = Term from the Medline controlled vocabulary, including terms found below this term in the MeSH hierarchy

[MeSH:NoExp] = Does not include terms found below this term in the MeSH hierarchy

[MAJR] = MeSH Major Topic

[Title/Abstract] = Title or abstract

[Title] = Title

[AU] = Author

[TW] = Text Word

Systematic[SB] = Filter for retrieving systematic reviews

\* = Truncation

#### Embase via Elsevier 01 December 2016

**Title: Treatment options for fractures of the upper extremity in the elderly: health economic aspects**

| Search terms                     | Items found                                                                                                                                                                                                                                                                                                                                                                                                                                                                                                                                           |         |
|----------------------------------|-------------------------------------------------------------------------------------------------------------------------------------------------------------------------------------------------------------------------------------------------------------------------------------------------------------------------------------------------------------------------------------------------------------------------------------------------------------------------------------------------------------------------------------------------------|---------|
| <b>Population: Arm fractures</b> |                                                                                                                                                                                                                                                                                                                                                                                                                                                                                                                                                       |         |
| 10.                              | 'osteoporosis'/exp/dm_su OR 'fragility fracture'/exp/mj OR 'arm fracture'/exp/mj                                                                                                                                                                                                                                                                                                                                                                                                                                                                      | 25382   |
| 11.                              | ((osteopor* OR fragility OR 'distal radial' OR 'distal radius' OR humerus OR humeral OR humerous OR supracondylar OR radius OR ulna OR wrist* OR "collum chirurgicum" OR hand OR elbow* OR olecranon OR arm OR shoulder* OR 'upper extremities' OR 'upper extremity' OR 'upper limb' OR 'upper limbs' OR forearm* OR 'fore arm' OR barton* OR colle*) NEAR/15 fracture*):ab,ti                                                                                                                                                                        | 43421   |
| 12.                              | 1 OR 2                                                                                                                                                                                                                                                                                                                                                                                                                                                                                                                                                | 51498   |
| <b>Population: Age</b>           |                                                                                                                                                                                                                                                                                                                                                                                                                                                                                                                                                       |         |
| 13.                              | 'adult'/de OR 'adulthood'/exp OR 'middle aged'/exp OR 'menopause and climacterium'/exp OR 'aged'/de OR 'aged hospital patient'/exp OR 'frail elderly'/exp OR 'very elderly'/exp OR (adult* OR old OR older):ti OR (aging OR 'middle age' OR 'middle ages' OR middleage* OR menopaus* OR postmenopaus* OR elderly OR elder OR aged OR 'old patients' OR 'old age' OR 'old people' OR 'older people'):ti,ab OR (post NEXT/2 menopaus*) OR men OR women:ti,ab                                                                                            | 7387386 |
| 14.                              | 3 AND 4                                                                                                                                                                                                                                                                                                                                                                                                                                                                                                                                               | 30130   |
| <b>Interventions</b>             |                                                                                                                                                                                                                                                                                                                                                                                                                                                                                                                                                       |         |
| 15.                              | 'orthopedic prostheses, orthoses and implants'/exp/mj OR 'fracture treatment'/exp/mj OR 'plaster cast'/exp OR 'arthroplasty'/de OR 'elbow arthroplasty'/exp OR 'finger arthroplasty'/exp OR 'shoulder arthroplasty'/exp OR 'joint mobilization'/exp/mj                                                                                                                                                                                                                                                                                                | 137996  |
| 16.                              | ((nail* OR plate OR plating OR plates OR pin OR pins OR pinning OR implant* OR screw* OR wire* OR "k-wire" OR kirschner* OR splint* OR "tension band" OR orthotic OR orthosis OR tape OR plaster OR brace* OR collar OR slab OR bridging OR "non-bridging" OR nonbridging) NEAR/8 (fracture* OR fixation* OR locking OR looked)) OR "internal fixation" OR "external fixation" OR prosthes* OR cast OR casts OR plaster* OR arthroplast* OR (surgical NEXT/2 treatment*) OR (nonsurgical NEXT/2 treatment*) OR (conservative NEXT/2 treatment*):ab,ti | 412008  |
| 17.                              | 6 OR 7                                                                                                                                                                                                                                                                                                                                                                                                                                                                                                                                                | 475682  |

| Combined sets                                                |                                                                                                                                                                                                                                                                                                                                                                                                                                                                                      |            |
|--------------------------------------------------------------|--------------------------------------------------------------------------------------------------------------------------------------------------------------------------------------------------------------------------------------------------------------------------------------------------------------------------------------------------------------------------------------------------------------------------------------------------------------------------------------|------------|
| 18.                                                          | 5 AND 8                                                                                                                                                                                                                                                                                                                                                                                                                                                                              | 20542      |
| Health economic aspects (filter: revised version of NHS EED) |                                                                                                                                                                                                                                                                                                                                                                                                                                                                                      |            |
| 19.                                                          | ('health economics'/de OR 'economic evaluation'/exp OR 'health care cost'/exp OR 'pharmacoeconomics'/exp OR econom*:ab,ti OR cost:ab,ti OR costs:ab,ti OR costly:ab,ti OR costing:ab,ti OR price:ab,ti OR prices:ab,ti OR pricing:ab,ti OR pharmacoeconomic*:ab,ti OR (expenditure* NOT energy):ti,ab OR (value NEXT/2 money):ab,ti OR Budget*:ab,ti) NOT ((metabolic NEXT/2 cost):ab,ti OR ((energy or oxygen) NEXT/2 cost):ab,ti OR ((energy or oxygen) NEAR/2 expenditure):ab,ti) | 1084700    |
| Limits                                                       |                                                                                                                                                                                                                                                                                                                                                                                                                                                                                      |            |
| 20.                                                          | (([danish]/lim OR [english]/lim OR [norwegian]/lim OR [swedish]/lim) AND [1990-2016]/py                                                                                                                                                                                                                                                                                                                                                                                              |            |
| <b>9 AND 10 AND 11</b>                                       |                                                                                                                                                                                                                                                                                                                                                                                                                                                                                      | <b>316</b> |

/de= Term from the EMTREE controlled vocabulary

/exp= Includes terms found below this term in the EMTREE hierarchy

/mj = Major Topic

:ab = Abstract

:au = Author

:ti = Article Title

:ti:ab = Title or abstract

\* = Truncation

“ “ = Citation Marks; searches for an exact phrase “ “ = Citation Marks; searches for an exact phrase

## Cochrane Library via Wiley 01 December 2016 (CDSR, DARE & CENTRAL)

### Title: Treatment options for fractures of the upper extremity in the elderly: health economic aspects

| Search terms                                                                                                                                                                                                                                                                                                                                                                                                                                                 | Items found |
|--------------------------------------------------------------------------------------------------------------------------------------------------------------------------------------------------------------------------------------------------------------------------------------------------------------------------------------------------------------------------------------------------------------------------------------------------------------|-------------|
| <b>Population: Arm fractures</b>                                                                                                                                                                                                                                                                                                                                                                                                                             |             |
| 21. [mh "osteoporotic fractures"] or [mh osteoporosis/PX,SU] or [mh "radius fractures"] or [mh "colles' fracture"] OR [mh "ulna fractures"] OR [mh "humeral fractures"] OR [mh "shoulder fractures"] OR [mh "wrist injuries"]                                                                                                                                                                                                                                | 941         |
| 22. ((osteopor* or "distal radial" or "distal radius" or humerus or humeral or humerous or supracondylar or ulna or wrist* or "collum chirurgicum" or elbow* or olecranon or shoulder* or arm or "upper extremities" or "upper extremity" or "upper limb" or "upper limbs" or forearm* or "fore arm" or barton* or colle*) near/4 fracture*):ti,ab,kw                                                                                                        | 3051        |
| 23. 1 OR 2                                                                                                                                                                                                                                                                                                                                                                                                                                                   | 3168        |
| <b>Population: Age</b>                                                                                                                                                                                                                                                                                                                                                                                                                                       |             |
| 24. [mh^adult] or [mh aged] or [mh "middle aged"] or [mh "aged, 80 and over"] OR [mh "frail elderly"] or [mh menopause] or [mh "age factors"] or (adult* or old or older):ti or (aging or elderly or elder or aged or "old patients" or "old age" or "old people" or "middle age" or "middle ages" or menopaus* or "post menopause" or "post menopausal" or postmenopaus*):ti,ab,kw                                                                          | 396963      |
| 25. 3 AND 4                                                                                                                                                                                                                                                                                                                                                                                                                                                  | 1993        |
| <b>Interventions</b>                                                                                                                                                                                                                                                                                                                                                                                                                                         |             |
| 26. [mh "orthopedic fixation devices"] or [mh "bone nails"] or [mh "bone plates"] or [mh "bone screws"] or [mh "bone wires"] or [mh "casts, surgical"] or [mh "external fixators"] or [mh "internal fixators"] or [mh splints] or [mh "suture anchors"] or [mh "orthotic devices"] or [mh "athletic tape"] or [mh braces] or [mh "fracture fixation, internal"] or [mh "fracture fixation, intramedullary"] or [mh "fracture fixation"] or [mh arthroplasty] | 8318        |



|                      |                                                                                                                                                                                                                                                                                                                                                                                                                                                                                       |             |
|----------------------|---------------------------------------------------------------------------------------------------------------------------------------------------------------------------------------------------------------------------------------------------------------------------------------------------------------------------------------------------------------------------------------------------------------------------------------------------------------------------------------|-------------|
| 27.                  | (nail* or plate or plating or plates or pin or pins or pinning or implant* or screw* or wire* or "k-wire" or kirschner* or splint* or "tension band" or orthotic or orthosis or tape or plaster or brace* or collar or slab or bridging or "non-bridging" or nonbridging or "external fixation" or "internal fixation" or prosthes* or cast or casts or plaster* or arthroplast* or (non next surgical) or (nonsurgical next treatment*) or (conservative next treatment*)): ti,ab,kw | 47232       |
| 28.                  | 6 OR 7                                                                                                                                                                                                                                                                                                                                                                                                                                                                                | 47852       |
| <b>Combined sets</b> |                                                                                                                                                                                                                                                                                                                                                                                                                                                                                       |             |
| 29.                  | 5 AND 8                                                                                                                                                                                                                                                                                                                                                                                                                                                                               | 1106        |
| <b>Limits</b>        |                                                                                                                                                                                                                                                                                                                                                                                                                                                                                       |             |
| 30.                  | Publication Year from 1990 to 2016                                                                                                                                                                                                                                                                                                                                                                                                                                                    |             |
|                      | <b>9 AND 10</b>                                                                                                                                                                                                                                                                                                                                                                                                                                                                       | <b>581</b>  |
|                      |                                                                                                                                                                                                                                                                                                                                                                                                                                                                                       | CDSR/69     |
|                      |                                                                                                                                                                                                                                                                                                                                                                                                                                                                                       | DARE/21     |
|                      |                                                                                                                                                                                                                                                                                                                                                                                                                                                                                       | Central/476 |
|                      |                                                                                                                                                                                                                                                                                                                                                                                                                                                                                       | CRM/        |
|                      |                                                                                                                                                                                                                                                                                                                                                                                                                                                                                       | HTA/3       |
|                      |                                                                                                                                                                                                                                                                                                                                                                                                                                                                                       | EED/12      |

The search result, usually found at the end of the documentation, forms the list of abstracts.

“ ” = Citation Marks; searches for an exact phrase

CDSR = Cochrane Database of Systematic Review

CENTRAL = Cochrane Central Register of Controlled Trials, “trials”

CRM = Method Studies

DARE = Database Abstracts of Reviews of Effects, “other reviews”

EED = Economic Evaluations

HTA = Health Technology Assessments
