# Supplementary material for: Treatment of humerus fractures in the elderly: A systematic review covering effectiveness, safety, economic aspects and evolution of practice
Source: PubMed Central journal article supplement (PMC6292626; doi:10.1371/journal.pone.0207815), 2018-12-13
Supplement: pone.0207815.s005.pdf [file pone.0207815.s005.pdf]

## S5 Appendix Cost analysis - units and unit costs

Resource utilization for treatment of proximal humerus fractures in a Swedish setting, estimated for the purpose of a HTA analysis performed by the Swedish Agency for Health Technology Assessment and Assessment of Social Services

| Resources                                         | Sling   | Plate fixation                                           | Intramedullary (IM) nail fixation                                | Hemiarthroplasty (HA)        | Reverse shoulder arthroplasty (RSA) |
|---------------------------------------------------|---------|----------------------------------------------------------|------------------------------------------------------------------|------------------------------|-------------------------------------|
| Material (consumables and implants) per treatment | Sling   | 1 plate with associated screws, surgical dressing, sling | Nail with associated locking screw (s), surgical dressing, sling | HA, surgical dressing, sling | RSA, surgical dressing, sling       |
| Preparation time (minutes) <sup>1</sup>           |         | 120                                                      | 120                                                              | 120                          | 120                                 |
| Operating time/ treatment time (minutes)          |         | 100 [1-7]                                                | 60[3, 8, 9]                                                      | 120 [10, 11]                 | 120 [10]                            |
| Post operation time (minutes) <sup>1</sup>        |         | 60                                                       | 60                                                               | 60                           | 60                                  |
| Orthopedic surgeon (minutes) <sup>2</sup>         | 10 [12] | 120                                                      | 80                                                               | 140                          | 140                                 |

---

|                                                              |         |     |     |     |     |
|--------------------------------------------------------------|---------|-----|-----|-----|-----|
| Assisting orthopaedic surgeon (minutes) <sup>3</sup>         | 0       | 100 | 60  | 120 | 120 |
| Anesthetist (minutes) <sup>4</sup>                           | 0       | 65  | 65  | 65  | 65  |
| Anaesthetic nurse (minutes) <sup>4</sup>                     | 0       | 280 | 240 | 300 | 300 |
| Surgical nurse (minutes) <sup>4</sup>                        | 0       | 280 | 240 | 300 | 300 |
| Operation assistant (minutes) <sup>4</sup>                   | 0       | 280 | 240 | 300 | 300 |
| Out-patient clinic nurse (minutes) <sup>5</sup>              | 15 [12] |     |     |     |     |
| Inpatient care duration due to operation (days) <sup>5</sup> | 0       | 2   | 2   | 3   | 3   |

<sup>1</sup> Assumption by expert senior scientists in the research group based on reported data from three large Swedish general hospitals' computerized operation planning systems.

<sup>2</sup> Included during operating time + 10 minutes before and 10 minutes after for preparation and documentation of surgical procedure.

<sup>3</sup> Included only for part of operating time. Represents time needed for training of junior orthopedic surgeons.

<sup>4</sup> Included during preparation time, operating time and post operation time.

<sup>5</sup> Assumption by expert senior scientists in the research group.

Unit costs for treatment of proximal humerus fracture in US Dollars, 2016. Estimated for the purpose of a HTA analysis performed by the Swedish Agency for Health Technology Assessment and Assessment of Social Services

| Resources for proximal humerus fracture treatment                                               | Cost per treatment | References |
|-------------------------------------------------------------------------------------------------|--------------------|------------|
| Sling                                                                                           | 2                  | [13]       |
| Plate fixation with screws                                                                      | 489                | [13-15]    |
| Intramedullary (IM) nail                                                                        | 489                | [13-15]    |
| Hemiarthroplasty (HA)                                                                           | 1363               | [13-15]    |
| Reverse shoulder arthroplasty (RSA)                                                             | 3518               | [13-15]    |
| Other resources                                                                                 | Costs per minute   | References |
| Theatre operating time (including operating theatre rental, overhead costs and fixed equipment) | 3.2                | [13]       |
| Orthopedic surgeon                                                                              | 2.4                | [13]       |
| Assisting orthopedic surgeon                                                                    | 2.4                | [13]       |
| Anesthetist                                                                                     | 2.4                | [13]       |
| Anaesthetic nurse                                                                               | 1.1                | [13]       |
| Surgical nurse                                                                                  | 1.1                | [13]       |
| Operation assistant                                                                             | 0.8                | [13]       |
| Out-patient clinic nurse                                                                        | 0,9                | [13]       |
| Inpatient care duration due to operation (days)*                                                | 522                | [13-15]    |

## References

1. Olerud P, Ahrengart L, Ponzer S, Saving J, Tidermark J. Internal fixation versus nonoperative treatment of displaced 3-part proximal humeral fractures in elderly patients: a randomized controlled trial. *Journal of shoulder and elbow surgery / American Shoulder and Elbow Surgeons [et al]*. 2011;20(5):747-55. Epub 2011/03/26. doi: 10.1016/j.jse.2010.12.018. PubMed PMID: 21435907.
2. Ortmaier R, Filzmaier V, Hitzl W, Bogner R, Neubauer T, Resch H, et al. Comparison between minimally invasive, percutaneous osteosynthesis and locking plate osteosynthesis in 3-and 4-part proximal humerus fractures. *BMC musculoskeletal disorders*. 2015;16:297. Epub 2015/10/16. doi: 10.1186/s12891-015-0770-4. PubMed PMID: 26467533; PubMed Central PMCID: PMC4607011.
3. Konrad G, Audige L, Lambert S, Hertel R, Sudkamp NP. Similar outcomes for nail versus plate fixation of three-part proximal humeral fractures. *Clinical orthopaedics and related research*. 2012;470(2):602-9. Epub 2011/09/01. doi: 10.1007/s11999-011-2056-y. PubMed PMID: 21879402; PubMed Central PMCID: PMC3254759.
4. Handschin AE, Cardell M, Contaldo C, Trentz O, Wanner GA. Functional results of angular-stable plate fixation in displaced proximal humeral fractures. *Injury*. 2008;39(3):306-13. Epub 2008/02/05. doi: 10.1016/j.injury.2007.10.011. PubMed PMID: 18243202.
5. Urda A, Gonzalez A, Colino A, Lopiz Y, Garcia-Fernandez C, Marco F. Management of displaced surgical neck fractures of the humerus: health related quality of life, functional and radiographic results. *Injury*. 2012;43 Suppl 2:S12-9. Epub 2013/05/03. doi: 10.1016/s0020-1383(13)70174-8. PubMed PMID: 23622986.
6. Voigt C, Geisler A, Hepp P, Schulz AP, Lill H. Are polyaxially locked screws advantageous in the plate osteosynthesis of proximal humeral fractures in the elderly? A prospective randomized clinical observational study. *Journal of orthopaedic trauma*. 2011;25(10):596-602. Epub 2011/06/15. doi: 10.1097/BOT.0b013e318206eb46. PubMed PMID: 21670709.

7. Konrad G, Hirschmüller A, Audige L, Lambert S, Hertel R, Südkamp NP. Comparison of two different locking plates for two-, three- and four-part proximal humeral fractures - Results of an international multicentre study. *International orthopaedics*. 2012;36(5):1051-8. doi: 10.1007/s00264-011-1410-8.
8. Lin J. Effectiveness of locked nailing for displaced three-part proximal humeral fractures. *The Journal of trauma*. 2006;61(2):363-74. Epub 2006/08/19. doi: 10.1097/01.ta.0000224148.73016.30. PubMed PMID: 16917452.
9. Kazakos K, Lyras DN, Galanis V, Verettas D, Psillakis I, Chatzipappas C, et al. Internal fixation of proximal humerus fractures using the Polarus intramedullary nail. *Archives of orthopaedic and trauma surgery*. 2007;127(7):503-8. Epub 2007/07/11. doi: 10.1007/s00402-007-0390-z. PubMed PMID: 17619889.
10. Boyle MJ, Youn SM, Frampton CM, Ball CM. Functional outcomes of reverse shoulder arthroplasty compared with hemiarthroplasty for acute proximal humeral fractures. *Journal of shoulder and elbow surgery / American Shoulder and Elbow Surgeons [et al]*. 2013;22(1):32-7. Epub 2012/06/02. doi: 10.1016/j.jse.2012.03.006. PubMed PMID: 22652065.
11. Olerud P, Ahrengart L, Ponzer S, Saving J, Tidermark J. Hemiarthroplasty versus nonoperative treatment of displaced 4-part proximal humeral fractures in elderly patients: a randomized controlled trial. *Journal of shoulder and elbow surgery / American Shoulder and Elbow Surgeons [et al]*. 2011;20(7):1025-33. Epub 2011/07/26. doi: 10.1016/j.jse.2011.04.016. PubMed PMID: 21783385.
12. Strohm PC, Muller CA, Boll T, Pfister U. Two procedures for Kirschner wire osteosynthesis of distal radial fractures. A randomized trial. *The Journal of bone and joint surgery American volume*. 2004;86-a(12):2621-8. Epub 2004/12/14. PubMed PMID: 15590845.
13. Operation planning system Orbit, Södersjukhuset (Stockholm South General Hospital), Stockholm, Sweden.
14. Operation planning system Operätt, Sahlgrenska University Hospital, Gothenburg, Sweden
15. Operation planning system, Skåne University Hospital, Malmö, Sweden.
