# Supplementary material for: Treatment of humerus fractures in the elderly: A systematic review covering effectiveness, safety, economic aspects and evolution of practice
Source: PubMed Central journal article supplement (PMC6292626; doi:10.1371/journal.pone.0207815), 2018-12-13
Supplement: pone.0207815.s006.pdf [file pone.0207815.s006.pdf]

## S6 Appendix Description of studies

Description of studies included in meta-analysis regarding treatment of proximal humerus fractures, and an evaluation of the risk of bias of individual studies. All data was collected for the purpose of an HTA analysis performed by the Swedish Agency for Health Technology Assessment and Assessment of Social Services, SBU.

### Proximal humerus fractures

#### Surgery vs non-operative treatment

| Treatment comparison                                    | Studies (RCTs and cohort studies), Fracture type* Treatment                                                                              | n   | Age                   | Outcome measurements                                     | Level of bias | Comments          |
|---------------------------------------------------------|------------------------------------------------------------------------------------------------------------------------------------------|-----|-----------------------|----------------------------------------------------------|---------------|-------------------|
| Hemiprosthesis vs non-operative treatment               | <b>Boons, 2012</b><br>Neer 4-part prox humerus fracture<br>Hemiarthroplasty vs non-operative                                             | 50  | >65                   | Constant score<br>Complications                          | Low           |                   |
|                                                         | <b>Olerud, 2011</b><br>Neer 4-part prox humerus fracture<br>Hemiarthroplasty vs non-operative                                            | 55  | >55                   | DASH<br>Constant score<br>EQ-5D<br>Complications         | Moderate      | 2 years follow-up |
| Different internal fixations vs non-operative treatment | <b>Fjalestad, 2014</b><br>Neer 3- och 4-part prox humerus fracture<br>Locking plate vs non-operative                                     | 50  | >60                   | ASES<br>Constant score<br>15-D                           | Low           | 2 years follow-up |
|                                                         | <b>Handoll, 2015</b><br>Neer 2-,3- och 4-part prox humerus fracture<br>Surgery (ORIF (any implant) or hemiarthroplasty) vs non-operative | 250 | >16<br>Mean age<br>66 | Oxford Shoulder score<br>EQ-5D<br>SF-12<br>Complications | Low           | 2 years follow-up |

|                                                                                                                                                                                           |     |                                      |                                                  |              |                                           |
|-------------------------------------------------------------------------------------------------------------------------------------------------------------------------------------------|-----|--------------------------------------|--------------------------------------------------|--------------|-------------------------------------------|
| <i>Hauschild, 2013</i><br><i>Neer 2-part prox humerus fracture (AO-type A2 and A3)</i><br><i>Surgery (locking plate or nail) vs non-operative</i>                                         | 164 | All ages.<br>Mean age<br>64          | Constant score                                   | Moderate/Low | 133 operative vs 31 non-operative         |
| <i>Innocenti, 2013</i><br><i>Neer 2-,3- and 4-part fractures</i><br><i>Perkutaneous pinning vs non-operative</i>                                                                          | 51  | >65                                  | Constant score<br>VAS                            | Moderate/Low |                                           |
| <b>Olerud et al 2011</b><br><i>Neer 3-part prox humerus fractures</i><br><i>Locking plate vs non-operative</i>                                                                            | 59  | >55                                  | DASH<br>Constant score<br>EQ-5D<br>Complications | Low          | 2 years follow-up                         |
| <i>Schai, 1995</i><br><i>Neer 3-part prox humerus fractures</i><br><i>Surgery (minimal intern fixation or plate or primary hemiprostesis or secondary hemiprostesis) vs non-operative</i> | 93  | Mean age<br>66 (range<br>28–87)      | Constant score                                   | Moderate/Low | 4 years follow-up<br>(range 1.5-14 years) |
| <b>Zyto, 1997</b><br><i>Neer 3- och 4-part prox humerus fracture</i><br><i>Cerclage (Tension Band Wires) vs non-operative</i>                                                             | 40  | “Elderly patients”<br>Mean age<br>74 | Constant score<br>ADL<br>Complications           | Low          | 50 months follow-up                       |

\*Neer CS 2nd. Displaced proximal humeral fractures. Part I. Classification and evaluation. J Bone Joint Surg Am 1970;52:1077–89.

Brorson S, Eckardt H, Audigé L, Rolauffs B, Bahrs C. Translation between the Neer- and the AO/OTA-classification for proximal humeral fractures: do we need to be bilingual to interpret the scientific literature? BMC Res Notes 2013;6:69.

**ADL:** Activities of Daily living; **AO:** Arbeitsgemeinschaft für Osteosynthesefragen; **ASES:** American Shoulder and Elbow Surgeons score; **DASH:** Disabilities of the Arm Shoulder and Hand;; **EQ-5D:** EuroQoL 5 Dimensions; **ORIF:** open reduction internal fixation; **SF-12:** 12-item Short-form health survey; **VAS:** Visual Analog Scale; **15-D:** 15 dimensional HRQoL instrument

## Proximal humerus fractures

### Surgery vs surgery

| Treatment comparison                 | Studies (RCTs and cohort studies), Fracture type* Treatment                                                                                | n   | Age                          | Outcome measurement                     | Level of bias | Comments                                     |
|--------------------------------------|--------------------------------------------------------------------------------------------------------------------------------------------|-----|------------------------------|-----------------------------------------|---------------|----------------------------------------------|
| Different types of internal fixation | <b>Buecking, 2014</b><br><i>Neer 2-,3- och 4-part prox humerus fractures Locking plate through Deltoid split vs deltopectoral incision</i> | 120 | >18, mean age 68             | Constant score<br>ADL<br>Complications  | Low           |                                              |
|                                      | <b>Konrad, 2012</b><br><i>Neer 2-,3- och 4-part prox humerus fracture LPHP plate (locking plate) vs Philos plate (locking plate)</i>       | 318 | >18<br>Mean age 64           | Constant score<br>Complications         | Moderate/Low  | Prospective multicentre                      |
|                                      | <b>Ortmaier, 2015</b><br><i>Neer 3- and 4-part proximal humerus fractures Locking plate vs Humerus block (HB)</i>                          | 60  | Mean age 61<br>(range 36–80) | Constant score                          | Moderate/Low  | Minimum of 24 months, 36-38 months follow-up |
|                                      | <b>Shi, 2011</b><br><i>Neer 2-,3- and 4-part prox humerus fractures Polyaxial vs monoaxial locking plates</i>                              | 76  | Mean age 69<br>(range 60–81) | Constant<br>Complications               | Moderate/Low  |                                              |
|                                      | <b>Voigt, 2011</b><br><i>Neer 3- and 4-part prox humerus fractures Polyaxial vs monoyaxial locking plates</i>                              | 56  | >60                          | DASH<br>Constant score<br>Complications | Low           |                                              |

|                                                        |                                                                                                                                                   |    |                                 |                                          |              |                                                |
|--------------------------------------------------------|---------------------------------------------------------------------------------------------------------------------------------------------------|----|---------------------------------|------------------------------------------|--------------|------------------------------------------------|
|                                                        | <i>Yan, 2012</i><br><i>Neer 2-,3-part prox humerus fractures</i><br><i>T-plate vs locking plate</i>                                               | 91 | All ages,<br>mean age 68        | ASES<br>HSS                              | Moderate/Low | 14-45 months follow-up                         |
| Different types of ORIF with or without medial support | <b>Liu, 2011</b><br><i>Neer 2-,3- and 4-part prox humerus fractures</i><br><i>Locking plate with or without calcium sulfate reinforcement</i>     | 50 | >60                             | Neer scoring system<br>Complications     | Moderate     | All patients with BMD below 2.5 (osteoporosis) |
|                                                        | <i>Peng, 2012</i><br><i>Neer 2-,3- and 4-part prox humerus fracture</i><br><i>Non-locking plate with or without bone allograft</i>                | 90 | >65                             | Complications                            | Moderate/Low |                                                |
|                                                        | <b>Zhang, 2011</b><br><i>Neer 2-part, 3-part and 4-part fracture</i><br><i>Locking plate with or without medial support screw</i>                 | 72 | >18 years,<br>mean age 63       | Constant score<br>Complications          | Low          |                                                |
| Different types of ORIF vs prosthesis                  | <b>Chen, 2016</b><br><i>Neer 4-part prox humerus fracture,</i><br><i>Locking plate with fibula graft vs</i><br><i>hemiarthroplasty</i>            | 60 | Mean age<br>66 (range<br>51-81) | DASH<br>Constant score<br>Complications  | Low          | All patients with BMD<-3,0 (osteoporosis)      |
|                                                        | <i>Ortmaier, 2015</i><br><i>Neer 3 and 4-part prox humerus fracture;</i><br><i>Reverse shoulder arthroplasty (RSA) vs</i><br><i>Humerus block</i> | 50 | >65                             | Constant score                           | Moderate/Low |                                                |
|                                                        | <i>Spross, 2012</i><br><i>Neer group 6 prox humerus fractures</i><br><i>Locking plate vs hemiarthroplasty</i>                                     | 44 | Mean age<br>75 (range<br>42-93) | Constant score<br>SF-36<br>Complications | Moderate/Low |                                                |

|               |                                                                                                                    |     |                           |                                               |              |                                                                                                                         |
|---------------|--------------------------------------------------------------------------------------------------------------------|-----|---------------------------|-----------------------------------------------|--------------|-------------------------------------------------------------------------------------------------------------------------|
| Plate vs nail | <b>Gracitelli, 2016</b><br><i>Neer 2-,3- part prox humerus fractures<br/>Locking plate vs intramedullary nail</i>  | 72  | 50–85 years               | DASH<br>Complications                         | Low          |                                                                                                                         |
|               | <b>Gratl, 2009</b><br><i>Neer 2-,3- and 4-part prox humerus fractures<br/>Locking plate vs intramedullary nail</i> | 152 | All ages,<br>mean age 63  | Constant score<br>Complications               | Moderate/Low | Prospective multicenter study                                                                                           |
|               | <b>Konrad, 2012</b><br><i>Neer 3-part prox humerus fractures<br/>Locking plate vs intramedullary nail</i>          | 211 | >18 years,<br>mean age 65 | Constant score<br>Neer score<br>Complications | Moderate/Low | Prospective                                                                                                             |
|               | <b>Urda, 2012</b><br><i>Neer 2-part prox humerus fractures<br/>Locking plate vs intramedullary nail</i>            | 50  | All ages,<br>mean age 70  | Constant score<br>EQ-5D<br>Complications      | Moderate/Low | Comparison of percutaneous pinning not included in analysis due to too few individuals, n=9<br>Mean follow-up 40 months |

\*Neer CS 2nd. Displaced proximal humeral fractures. Part I. Classification and evaluation. J Bone Joint Surg Am 1970;52:1077–89.

Brorson S, Eckardt H, Audigé L, Rolauff B, Bahrs C. Translation between the Neer- and the AO/OTA-classification for proximal humeral fractures: do we need to be bilingual to interpret the scientific literature? BMC Res Notes 2013;6:69.

**ADL:** Activities of daily living; **ASES:** American Shoulder and Elbow Surgeons score; **BMD:** Bone Mineral Density; **DASH:** Disabilities of the arm, shoulder and hand score;

**EQ-5D:** EuroQoL 5 Dimensions; **LPHP;** Locking Proximal Humerus Plate; **HSS:** Hospital for Special Surgery score; **ORIF:** open reduction internal fixation; **PHILOS:** Proximal humeral internal locking system; **SF-36:** 36 item Short Form Health survey; **RSA;** Reverse shoulder arthroplasty;

| Treatment comparison                                    | Studies (RCTs and cohort studies), Fracture type* Treatment                                                                                                                                   | n   | Age                       | Outcome measurement                           | Level of bias | Comments                                              |
|---------------------------------------------------------|-----------------------------------------------------------------------------------------------------------------------------------------------------------------------------------------------|-----|---------------------------|-----------------------------------------------|---------------|-------------------------------------------------------|
| Reverse shoulder arthroplasty (RSA) vs hemiarthroplasty | <i>Boyle, 2013</i><br>Prox humerus fractures treated with prosthesis: Reverse shoulder arthroplasty (RSA) vs hemiarthroplasty                                                                 | 368 | All ages, mean age 76     | OSS<br>Complications                          | Moderate/Low  | 5 years follow-up<br>Registry study<br>313 HA, 55 RSA |
|                                                         | <i>Cuff, 2013</i><br>Neer 3-part with involvement of major tubercle major, 4-part fractures or fractures with joint surface injury<br>Reverse shoulder arthroplasty (RSA) vs hemiarthroplasty | 53  | “elderly”.<br>Mean age 74 | ASES<br>Simple shoulder test<br>Complications | Moderate/Low  | 2 years follow-up                                     |
|                                                         | <i>Gallinet, 2009</i><br>Neer 3- and 4-part prox humerus fracture<br>Reverse shoulder arthroplasty (RSA) vs hemiarthroplasty                                                                  | 40  | Mean age 74 (range 49–95) | DASH<br>Constant<br>Complications             | Moderate/Low  |                                                       |
|                                                         | <b>Sebastia-Forcada, 2014</b><br>Prox. humerus fractures<br>Reverse shoulder arthroplasty (RSA) vs hemiarthroplasty                                                                           | 62  | >70                       | QuickDASH<br>Constant score<br>Complications  | Low           | 49 months follow-up                                   |
| Variations of fixation of tubercles                     | <b>Fialka 2008</b><br>Neer 4-part prox humerus fractures<br>Hemiarthroplasty with 2 different types of tubercle fixation                                                                      | 40  | >50                       | Constant score<br>Complications               | Moderate      | Time point for outcome measurement not stated         |

|                                    |                                                                                                                                                                                    |    |                                   |                                 |              |  |
|------------------------------------|------------------------------------------------------------------------------------------------------------------------------------------------------------------------------------|----|-----------------------------------|---------------------------------|--------------|--|
|                                    |                                                                                                                                                                                    |    |                                   |                                 |              |  |
|                                    | <i>Loew, 2006</i><br><i>Neer 3- and 4-part prox humerus fractures and fractures with split humeral head</i><br><i>Hemiarthroplasty with 2 different types of tubercle fixation</i> | 39 | Mean age<br>72 (range<br>54–88)   | Constant score                  | Moderate/Low |  |
|                                    | <i>Dietz, 2012</i><br><i>Neer 4-part prox humerus fractures</i><br><i>Suture vs wire fixation of major tubercle during hemiarthroplasty</i>                                        | 54 | Mean age<br>73 (range<br>45–97)   | Constant score                  | Moderate/Low |  |
|                                    | <i>Wu, 2013</i><br><i>Neer 4-part prox humerus fractures</i><br><i>Hemiarthroplasty with 2 different types of tubercle fixation</i>                                                | 67 | Median age<br>70 (range<br>62–88) | Neer scoring system             | Moderate/Low |  |
| Variations of intramedullary nails | <b>Lopez, 2014</b><br><i>Neer 2- and 3-part prox humerus fractures</i><br><i>Curvilinear vs straight intramedullary nail</i>                                                       | 52 | Mean age<br>70 (range<br>38–89)   | Constant score<br>Complications | Low          |  |

\*Neer CS 2nd. Displaced proximal humeral fractures. Part I. Classification and evaluation. J Bone Joint Surg Am 1970;52:1077–89.

Brorson S, Eckardt H, Audigé L, Rolauffs B, Bahrs C. Translation between the Neer- and the AO/OTA-classification for proximal humeral fractures: do we need to be bilingual to interpret the scientific literature? BMC Res Notes 2013;6:69.

**ASES:** American Shoulder and Elbow Surgeons score; **DASH:** Disabilities of the Arm Shoulder and Hand; **OSS:** Oxford shoulder score; **Quick-DASH:** Quick Disabilities of the Arm Shoulder and Hand; **RSA;** Reverse shoulder arthroplasty

## Distal humerus fractures

| Treatment comparison                   | Studies (RCTs and cohort studies), Fracture type* Treatment                                                                                          | n  | Age                       | Outcome measurement           | Level of bias | Comments |
|----------------------------------------|------------------------------------------------------------------------------------------------------------------------------------------------------|----|---------------------------|-------------------------------|---------------|----------|
| Variations of plates vs prosthesis     | <b>McKee, 2009</b><br><i>Distal humerus fractures AO type C ORIF (plate and screws) vs total elbow replacement</i>                                   | 40 | >65                       | DASH<br>MEPS<br>Complications | Low           |          |
| Variations of total elbow replacements | <b>Prasad, 2008</b><br><i>Total elbow joint replacement due to distal humerus fractures, AO type A3, B3, C3 Acute vs secondary joint replacement</i> | 32 | Mean age 78 (range 61–89) | MEPS<br>Complications         | Moderate/Low  |          |

\*Müller ME, Nazarian S, Koch P, 1990, The Comprehensive Classification of Fractures of Long Bones, Berlin, Heidelberg, Springer Verlag.

**AO:** Arbeitsgemeinschaft für Osteosynthesefragen; **DASH:** Disabilities of the arm, shoulder and hand score; **MEPS:** Mayo Elbow Performance Score; **ORIF:** open reduction internal fixation



## Diaphyseal humerus fractures

| Treatment comparison | Studies (RCTs and cohort studies),<br>Fracture type<br>Treatment                             | n    | Age                      | Outcome measurement | Level of bias | Comments       |
|----------------------|----------------------------------------------------------------------------------------------|------|--------------------------|---------------------|---------------|----------------|
| Plate vs nail        | <b>Chen, F., 2013</b><br><i>Diaphyseal humerus fractures<br/>ORIF vs Intramedullary nail</i> | 1385 | All ages,<br>mean age 74 | Complications       | Moderate/Low  | Registry study |

ORIF: open reduction internal fixation

## Proximal humerus fractures

### Rehabilitation after shoulder hemiarthroplasty

| Treatment comparison                  | Studies (RCTs and cohort studies),<br>Fracture type*<br>Treatment                                                                 | n  | Age                                  | Outcome measurement                             | Level of bias | Comments |
|---------------------------------------|-----------------------------------------------------------------------------------------------------------------------------------|----|--------------------------------------|-------------------------------------------------|---------------|----------|
| Comparison of different rehab regimes | <b>Agorastides, 2007</b><br><i>Neer 3- and 4-part prox humerus fractures<br/>Mobilization 2 vs 6 weeks after hemiarthroplasty</i> | 59 | “Physiologically old”<br>Mean age 70 | Oxford score<br>Constant score<br>Complications | Low           |          |

\*Neer CS 2nd. Displaced proximal humeral fractures. Part I. Classification and evaluation. J Bone Joint Surg Am 1970;52:1077–89.

Brorson S, Eckardt H, Audigé L, Rolauffs B, Bahrs C. Translation between the Neer- and the AO/OTA-classification for proximal humeral fractures: do we need to be bilingual to interpret the scientific literature? BMC Res Notes 2013;6:69.
